# Supplementary material for: [11C]CS1P1 PET links T-cell–associated immune activation with endothelial and astrocytic responses
Source: Research Square preprint supplement (doi:10.21203/rs.3.rs-9237372/v1), 2026-04-19
Supplement: Supplementary file 1 [file 967cdd0d7089c920ef5dbe4b.pdf]

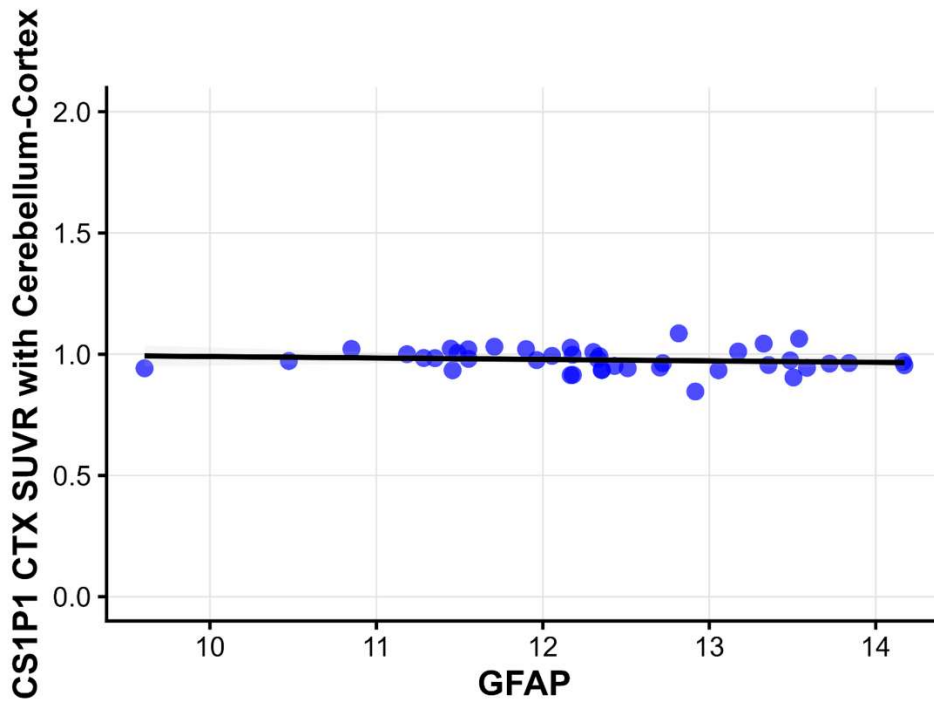

332

333 **Supplementary Figure 1.** Although the cortical CS1P1 SUVRs using the cerebellum-cortex  
334 have high test-retest reliability, there is poor discriminability between subjects, with all SUVRs  
335 hovering around 1. Many SUVRs are less than one, indicating the cerebellum-cortex has more  
336 uptake than the cortex and is not a preferred reference region for this tracer.

337

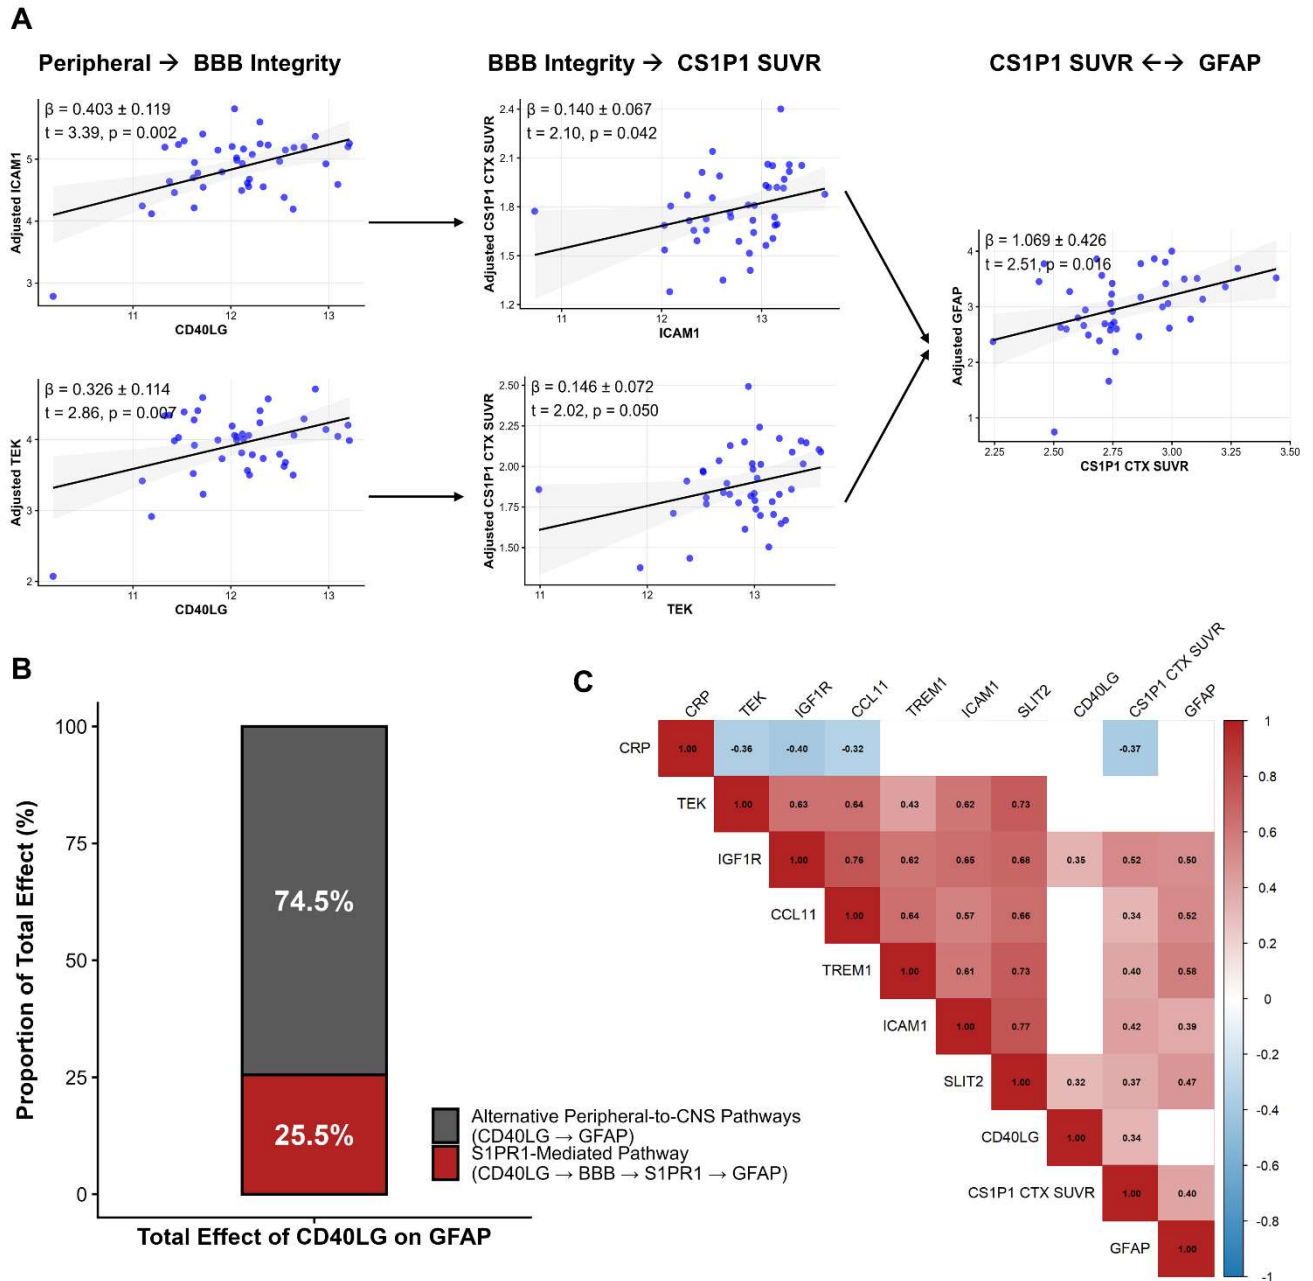

338

339 **Supplementary Figure 2. Pathway-specific correlations and causal mediation of the S1PR1**  
 340 **neuroimmune cascade.** (A) Pairwise scatter plots illustrating the age, sex, and A $\beta$ 42/40 adjusted  
 341 relationships between sequential nodes of the modeled SEM cascade (Peripheral CD40LG →  
 342 BBB Integrity → CS1P1 SUVR → GFAP). (B) Stacked bar chart quantifying the formal causal  
 343 mediation analysis. The specific S1PR1-mediated endothelial cascade accounts for 25.5% of the  
 344 total inflammatory drive from peripheral CD40LG to central GFAP. (C) Hierarchically clustered  
 345 Spearman correlation heatmap of the upregulated inflammatory proteins and [11C]-CS1P1  
 346 SUVR. Color intensity reflects the strength and direction of significant correlations ( $p < 0.05$ );  
 347 non-significant correlations are left blank.

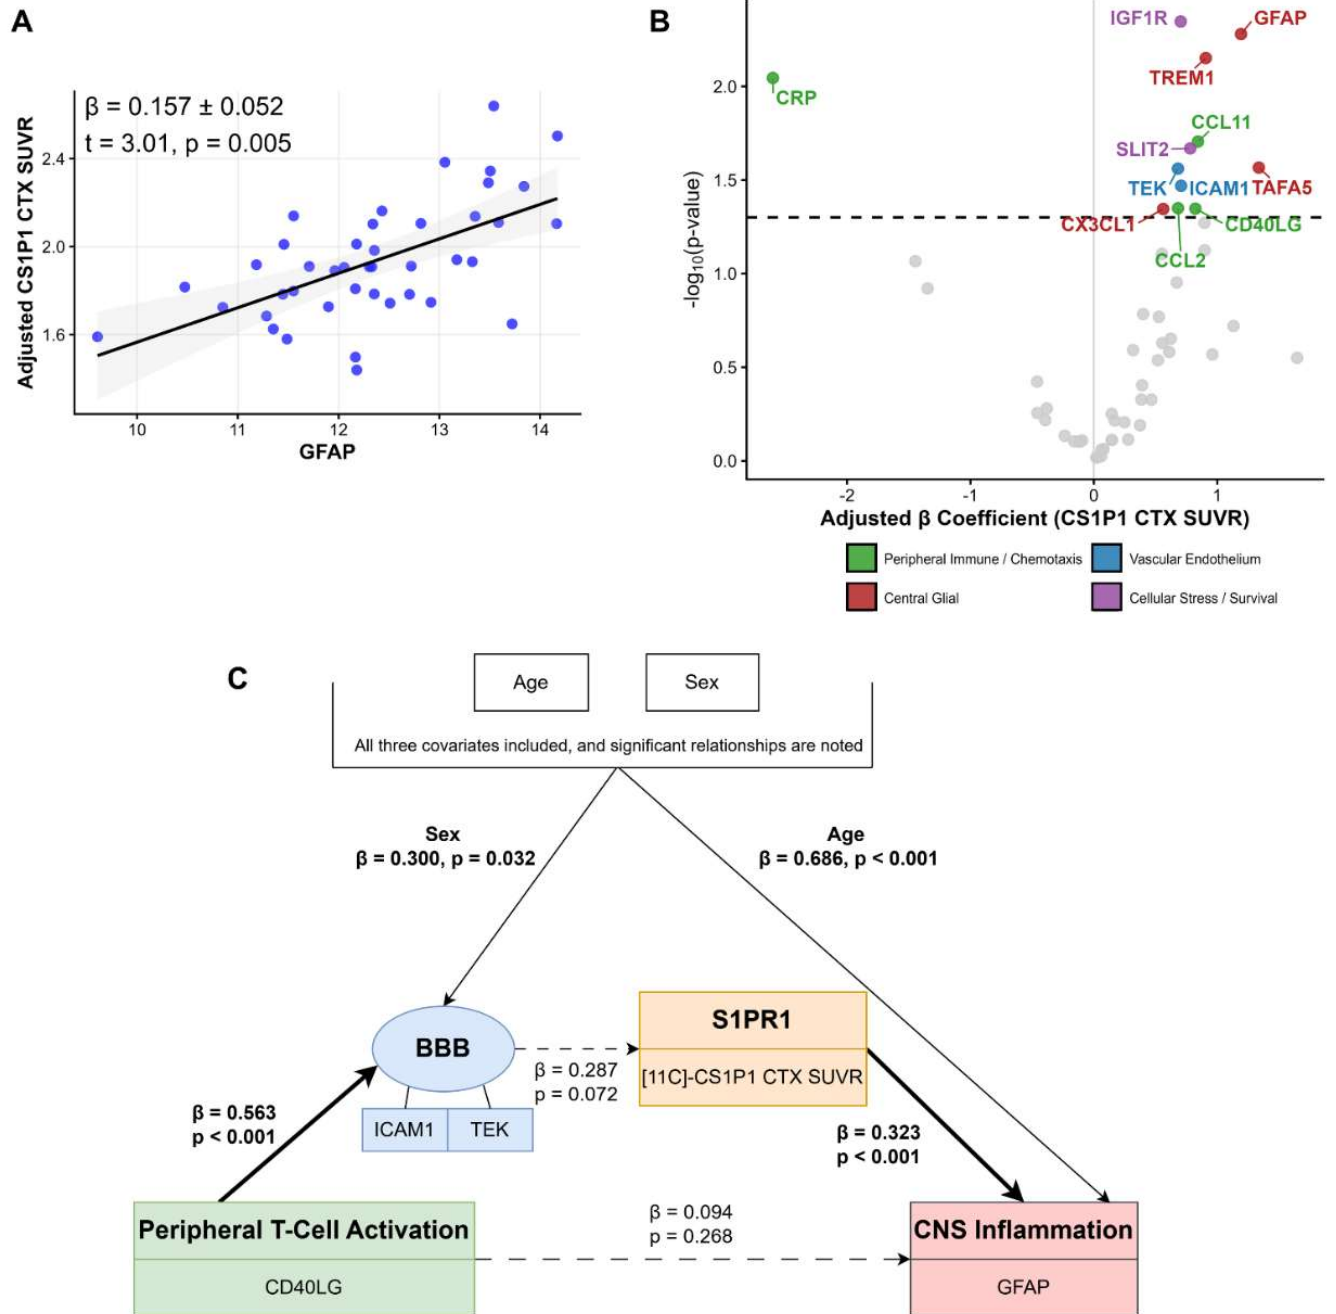

348

349 **Supplementary Figure 3: Re-evaluation of the S1PR1 neuroimmune cascade excluding**  
 350 **plasma A $\beta$ 42/40 as a covariate.** (A) Linear regression demonstrating a significant positive  
 351 association between adjusted cortical [ $^{11}$ C]CS1P1 SUVR and plasma GFAP ( $\beta = 0.157 \pm 0.052, p$   
 352  $= 0.005$ ), controlling only for age and sex. (B) Volcano plot of the differential abundance analysis  
 353 evaluating inflammatory plasma proteins against cortical [ $^{11}$ C]CS1P1 SUVR. Removing  
 354 A $\beta$ 42/40 as a covariate introduces additional significant peripheral and central markers (e.g.,  
 355 TAF A5, CX3CL1, CCL2) into the uncorrected significance threshold. (C) Structural Equation  
 356 Modeling (SEM) path diagram isolating the astrocytic signaling cascade without adjusting for

357 baseline amyloid pathology. Failure to account for the inflammatory variance driven by A $\beta$ 42/40  
358 suppresses the S1PR1 signal, rendering the specific pathway from blood-brain barrier (BBB)  
359 disruption to central S1PR1 upregulation statistically insignificant ( $\beta = 0.287$ ,  $p = 0.072$ ). This  
360 indicates that adjusting for baseline AD pathology is required to isolate the independent  
361 peripheral-to-central neurovascular pathway.

362

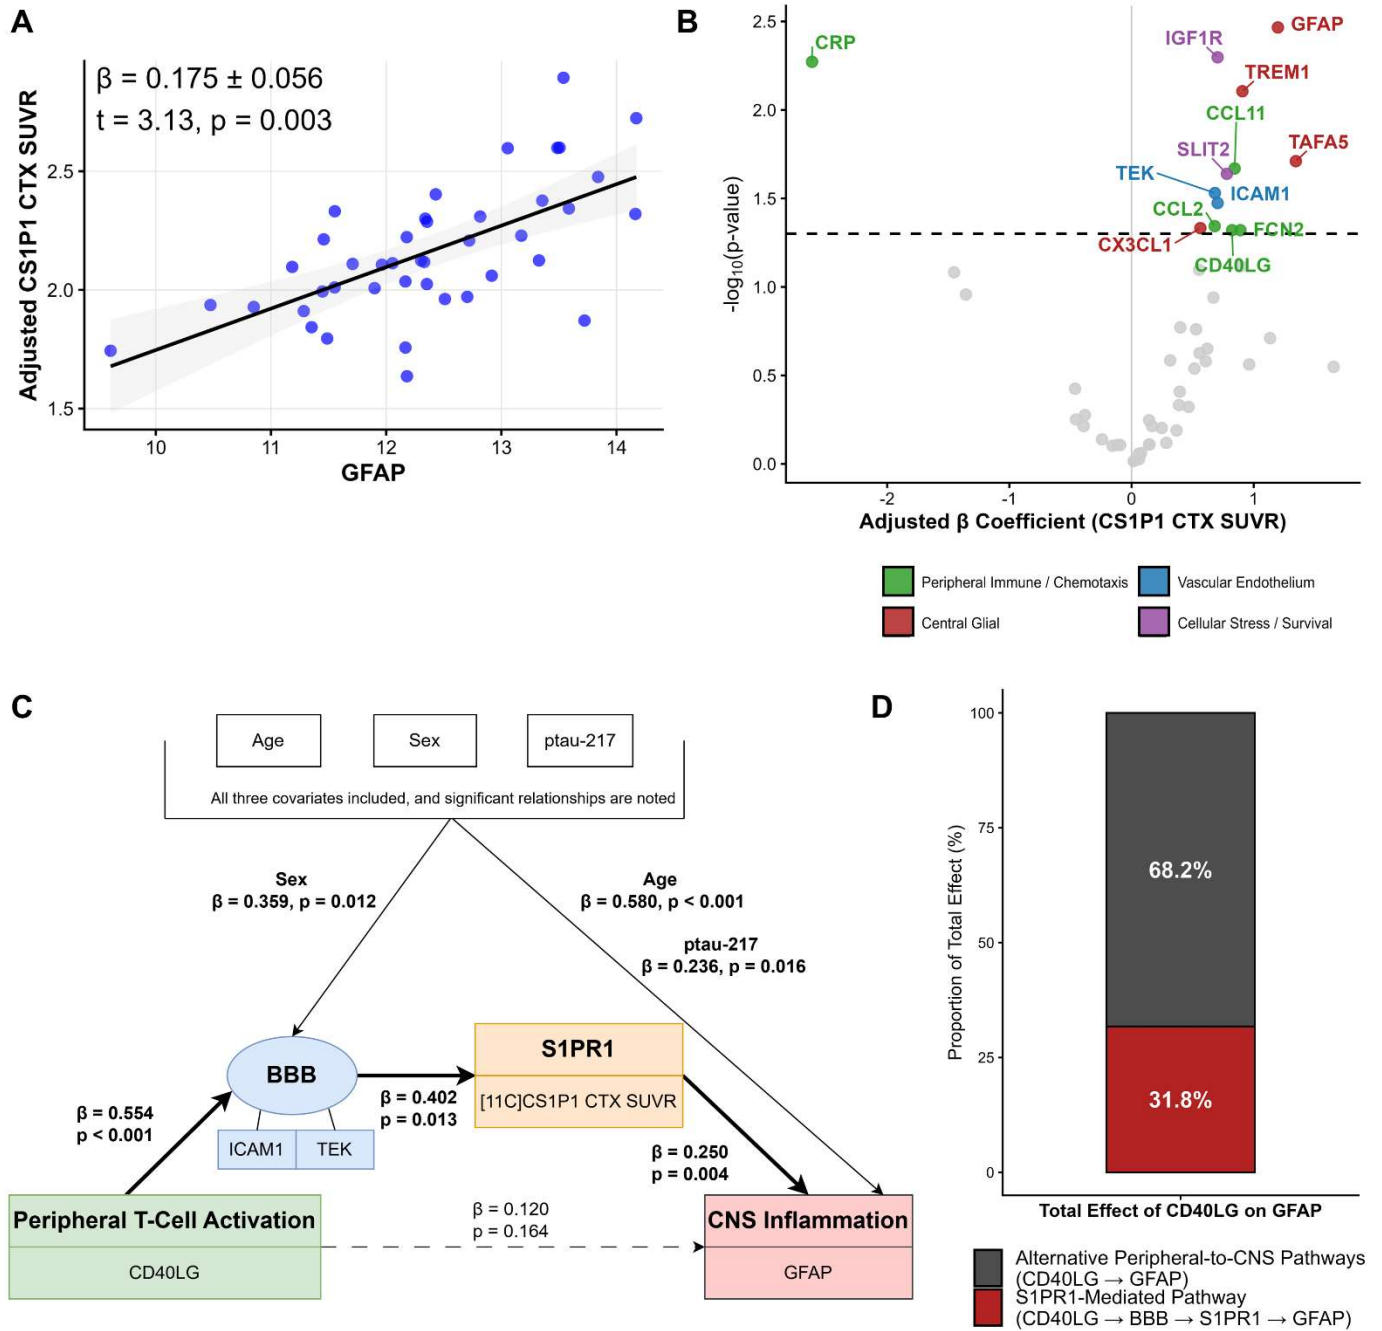

363

364 **Supplementary Figure 4: Sensitivity analysis of the S1PR1 neuroimmune cascade utilizing**  
 365 **plasma ptau-217 as a covariate.** To ensure the structural model was not dependent on the  
 366 specific Alzheimer's pathology biomarker utilized, analyses were re-evaluated using NULISaseq  
 367 plasma brain derived ptau-217 in place of the A $\beta$ 42/40 ratio. (A) Linear regression demonstrates  
 368 the positive association between adjusted cortical [ $^{11}$ C]CS1P1 SUVR and plasma GFAP remains  
 369 significant ( $\beta = 0.175 \pm 0.056, p = 0.003$ ). (B) Volcano plot of the differential abundance analysis  
 370 confirming that the peripheral immune, endothelial, and central glial markers remain

371 significantly associated with [<sup>11</sup>C]CS1P1 SUVR. (C) Structural Equation Modeling (SEM) path  
372 diagram. The primary sequential cascade remains significant. Notably, while ptau-217  
373 significantly independently predicts reactive astrogliosis (GFAP;  $\beta = 0.236$ ,  $p = 0.016$ ), it does  
374 not predict S1PR1. (D) Mediation analysis estimates the S1PR1 pathway accounts for 31.8% of  
375 the total inflammatory drive from peripheral CD40LG to central GFAP under these covariate  
376 parameters.

377

378

379

380

*Supplementary Table 1: Intraclass Correlation  
Coefficients (ICC) by Reference Region*

| Reference Region           | Cortical SUVR<br>ICC | 95% CI          | p-value |
|----------------------------|----------------------|-----------------|---------|
| Cerebellum-<br>Cortex      | 0.802                | [0.010, 0.990]  | 0.038   |
| Corpus Callosum            | 0.735                | [-0.640, 0.980] | 0.101   |
| Brainstem                  | 0.669                | [-0.240, 0.970] | 0.094   |
| Whole<br>Cerebellum        | 0.535                | [-0.290, 0.960] | 0.138   |
| Cerebellum<br>White Matter | 0.239                | [-0.480, 0.910] | 0.319   |

**Supplementary Table 2: Full Parameter Estimates for the S1PR1 Mediation Model**

| Structural Path /<br>Parameter                  | Unstandardized<br>Estimate | Standard<br>Error | Z-Value | P-Value        | Standardized<br>$\beta$ |
|-------------------------------------------------|----------------------------|-------------------|---------|----------------|-------------------------|
| BBB $\rightarrow$ ICAM1<br>(Factor Loading)     | 0.365                      | 0.060             | 6.119   | < <b>0.001</b> | 0.915                   |
| BBB $\rightarrow$ TEK<br>(Factor Loading)       | 0.304                      | 0.052             | 5.888   | < <b>0.001</b> | 0.827                   |
| CD40LG $\rightarrow$ BBB                        | 1.186                      | 0.328             | 3.610   | < <b>0.001</b> | 0.563                   |
| BBB $\rightarrow$ CS1P1<br>CTX SUVR             | 0.076                      | 0.028             | 2.699   | <b>0.007</b>   | 0.406                   |
| CS1P1 CTX SUVR<br>$\rightarrow$ GFAP            | 0.815                      | 0.406             | 2.006   | <b>0.045</b>   | 0.196                   |
| CD40LG $\rightarrow$ GFAP                       | 0.213                      | 0.147             | 1.451   | 0.147          | 0.131                   |
| Age $\rightarrow$ BBB                           | 0.007                      | 0.011             | 0.673   | 0.501          | 0.105                   |
| Sex $\rightarrow$ BBB                           | 1.175                      | 0.507             | 2.316   | <b>0.021</b>   | 0.341                   |
| A $\beta$ 42/40 $\rightarrow$ BBB               | 1.414                      | 4.947             | 0.286   | 0.775          | 0.045                   |
| Age $\rightarrow$ CS1P1 CTX<br>SUVR             | -0.001                     | 0.002             | -0.484  | 0.629          | -0.074                  |
| Sex $\rightarrow$ CS1P1 CTX<br>SUVR             | -0.158                     | 0.090             | -1.755  | 0.079          | -0.246                  |
| A $\beta$ 42/40 $\rightarrow$ CS1P1<br>CTX SUVR | -2.467                     | 0.896             | -2.753  | <b>0.006</b>   | -0.426                  |
| Age $\rightarrow$ GFAP                          | 0.033                      | 0.005             | 6.163   | < <b>0.001</b> | 0.626                   |
| Sex $\rightarrow$ GFAP                          | -0.263                     | 0.243             | -1.084  | 0.278          | -0.099                  |
| A $\beta$ 42/40 $\rightarrow$ GFAP              | -3.766                     | 2.668             | -1.412  | 0.158          | -0.157                  |
| Indirect (Defined<br>Effect)                    | 0.073                      | 0.048             | 1.528   | 0.127          | 0.045                   |
| Total (Defined<br>Effect)                       | 0.286                      | 0.146             | 1.964   | 0.050          | 0.176                   |
| Proportion mediated<br>(Defined Effect)         | 0.255                      | 0.197             | 1.296   | 0.195          | 0.255                   |

*Supplementary Table 3: Structural Equation Model Configurations and Fit Comparisons*

| Model                                                                  | $\chi^2$ | df | Model p-value | CFI          | RMSEA        | AIC              | BIC              |
|------------------------------------------------------------------------|----------|----|---------------|--------------|--------------|------------------|------------------|
| <b>Ideal Fit Thresholds</b>                                            | -        | -  | > 0.05        | $\geq 0.95$  | < 0.08       | Lower is better* | Lower is better* |
| <b>1A. Primary Sequence:<br/>CD40LG → BBB → S1PR1<br/>→ GFAP</b>       | 3.127    | 7  | 0.873         | 1.000        | 0.000        | 158.40           | 191.41           |
| <b>1B. Alt Sequence: CD40LG<br/>→ BBB → GFAP → S1PR1</b>               | 5.129    | 7  | 0.644         | 1.000        | 0.000        | 160.40           | 193.41           |
| <b>1C. Alt Sequence<br/>(Reverse): GFAP → S1PR1<br/>→ BBB → CD40LG</b> | 4.062    | 7  | 0.773         | 1.000        | 0.000        | 158.27           | 191.29           |
| <b>1D. Alt Sequence: CD40LG<br/>→ S1PR1 → BBB → GFAP</b>               | 15.201   | 7  | 0.034         | <b>0.917</b> | <b>0.167</b> | 170.47           | 203.49           |
| <b>2A. Microglial Outcome:<br/>GFAP swapped for TREM1</b>              | 17.735   | 7  | 0.013         | <b>0.879</b> | <b>0.191</b> | 140.45           | 173.46           |
| <b>2B. Dual Outcome:<br/>Separate (GFAP + TREM1)</b>                   | 18.143   | 9  | 0.034         | <b>0.930</b> | <b>0.156</b> | 224.41           | 269.59           |
| <b>2C. Dual Outcome: Latent<br/>CNS (GFAP + TREM1)</b>                 | 23.332   | 13 | 0.038         | <b>0.920</b> | <b>0.138</b> | 221.60           | 259.83           |

\*Note: AIC and BIC are relative parsimony indices. They can be directly compared within Group 1 (1A, 1B, 1C, 1D) because the models evaluate identical variables. Models evaluating alternative causal directions (1D) or microglial activation (2A, 2B, 2C) universally fail absolute fit criteria (CFI < 0.95, RMSEA > 0.08, red), confirming both the specific directionality and astrocytic specificity of the cascade.
